# Supplementary material for: Recovery of phenotypically sorted cells using droplet-digital microfluidics
Source: Royal Society of Chemistry journal article supplement (doi:10.1039/d5lc00415b), 2025-01-01
Supplement: d5lc00415b1.pdf [file d5lc00415b1.pdf]

## Supporting Information

### Recovery of phenotypically sorted cells using droplet-digital microfluidics

Zhiyang Deng<sup>1, 2</sup>, James M. Perry<sup>2</sup>, Marian Weiss<sup>3</sup>, Robert Genth<sup>3</sup>, Alexis Autour<sup>4</sup>, Christoph A.  
Merten<sup>\*4</sup>, Steve C.C. Shih<sup>\*1, 2</sup>

<sup>1</sup> Department of Electrical and Computer Engineering, Concordia University, Montréal, Canada.

<sup>2</sup> Centre for Applied Synthetic Biology, Concordia University, Montréal, Canada.

<sup>3</sup> VERAXA Biotech GmbH, Heidelberg, Germany.

<sup>4</sup> Institute of Bioengineering, École Polytechnique Fédérale de Lausanne (EPFL), Lausanne, Switzerland.

\*Co-corresponding authors

Email: christoph.merten@epfl.ch

Email: steve.shih@concordia.ca

## Table of Contents

|                                                                                                              |          |
|--------------------------------------------------------------------------------------------------------------|----------|
| <b>Supplementary Figures .....</b>                                                                           | <b>3</b> |
| Figure S1. D <sup>2</sup> and co-encapsulation chip design. ....                                             | 3        |
| Figure S2. Fluorescent bead gating and D <sup>2</sup> sorting/recovery software interface.....               | 5        |
| Figure S3. SYTOX Blue staining and single-cell proliferation after FACS. ....                                | 6        |
| <b>Supplementary Tables.....</b>                                                                             | <b>7</b> |
| Table S1. Comparison between existing systems and D <sup>2</sup> system.....                                 | 7        |
| Table S2. Statistics for the recovery rate of 5, 10, 20, 50 beads using D <sup>2</sup> and tubing methods. . | 8        |

## Supplementary Figures

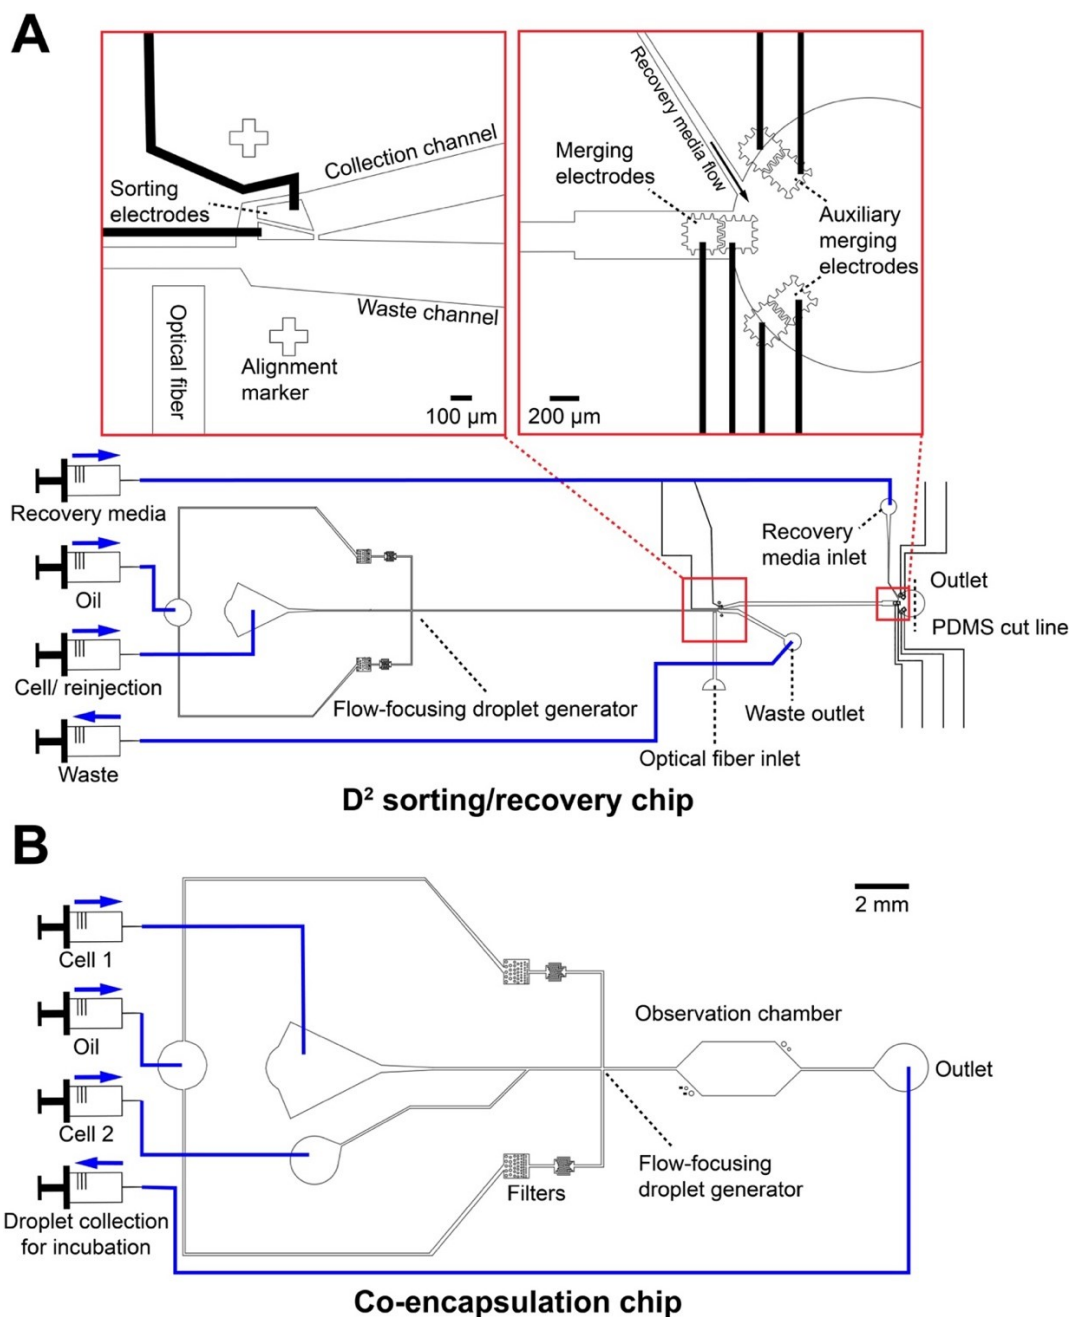

**Figure S1. D<sup>2</sup> and co-encapsulation chip design.**

(A) AutoCAD drawings of D<sup>2</sup> sorting/ recovery chip design. Overall view is shown on the bottom, DMF sorting electrodes and merging electrodes are highlighted in red boxes. (B) An AutoCAD drawing of a co-encapsulation chip design. All PDMS channels have a width of  $\sim 100\ \mu\text{m}$  (except for collection -  $210\ \mu\text{m}$ , waste -  $240\ \mu\text{m}$ , outlet -  $350\ \mu\text{m}$  and observation chamber -  $2000\ \mu\text{m}$ ) and a height of  $\sim 100\ \mu\text{m}$ . The blue lines highlight the fluidic connections using syringes, and the blue arrows indicate the flow direction (dispense or withdraw).

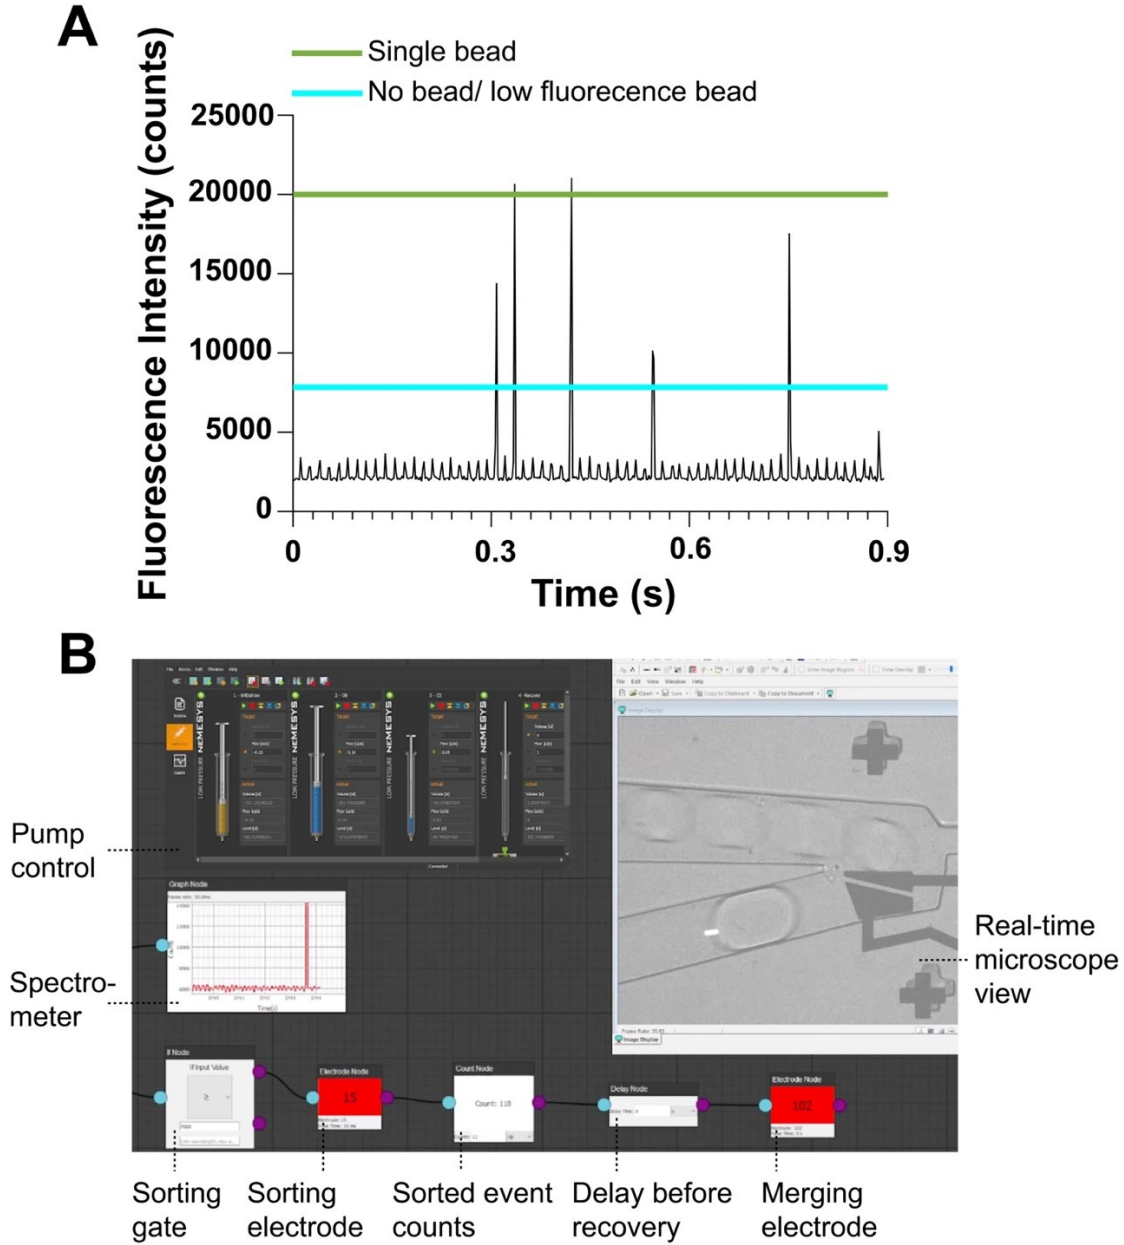

**Figure S2. Fluorescent bead gating and D<sup>2</sup> sorting/recovery software interface.**

(A) Graph showing detection of droplet with a frequency of about 50 Hz, using 0.02  $\mu\text{L/s}$  droplet re-injection flow rate and 0.15  $\mu\text{L/s}$  spacer oil flow rate. Empty or low-intensity-bead droplets  $< 7 \times 10^3$  counts – blue line, and multiple-bead droplets  $> 2 \times 10^4$  counts – green line. Droplets with counts between  $7 \times 10^3$  and  $2 \times 10^4$  were sorted as single-bead droplets. (B) Image showing real-time sorting/recovery software interface. A peak was detected/shown in the spectrometer graph, sorting electrode was actuated to sort the single-bead containing droplet to the collection channel, sorted event counts increased by 1, an 8-second delay was set for sorted droplet to travel to the collection site and the merging electrode was actuated after the delay to collect the content from the sorted droplet.

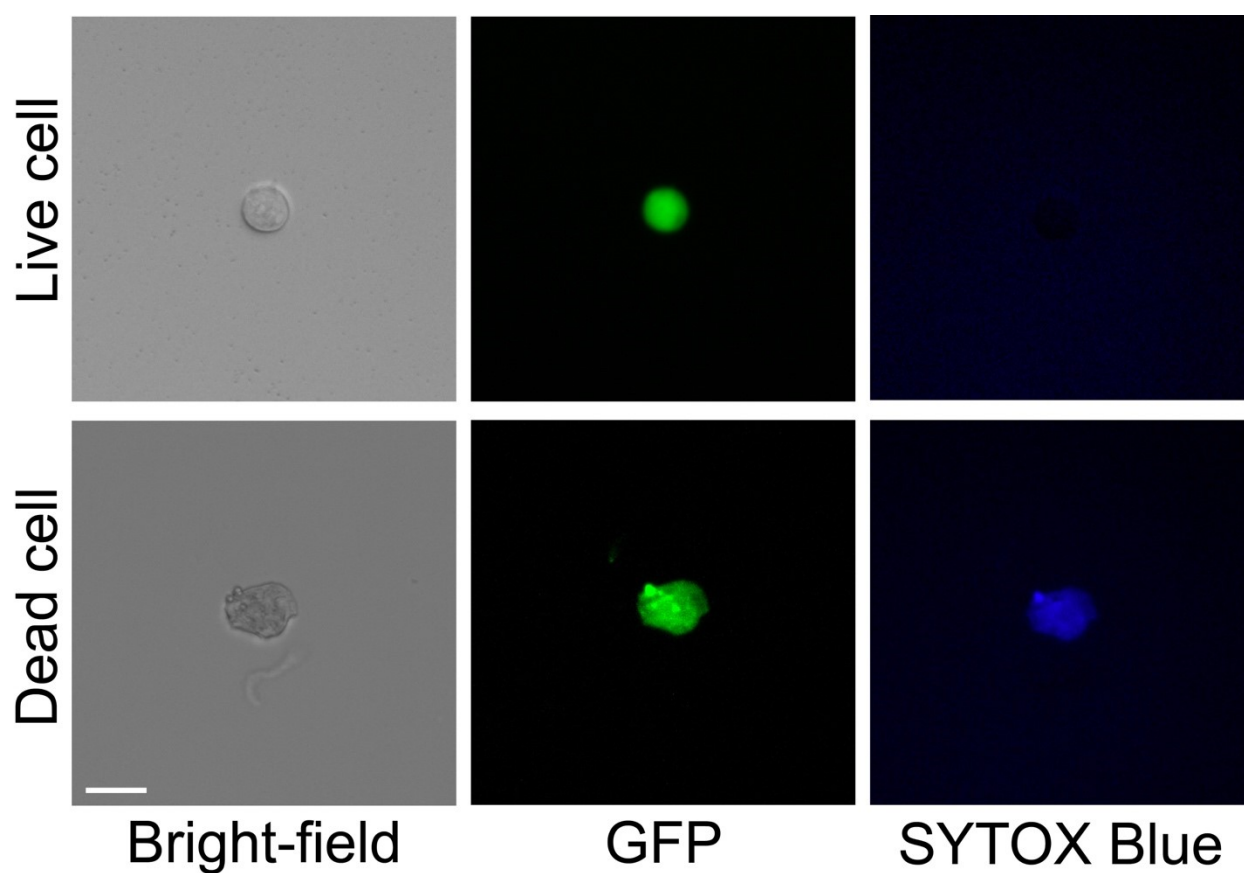

**Figure S3. SYTOX Blue staining and single-cell proliferation after FACS.**

Images showing SYTOX Blue staining of live and dead single HEK 293 cell 10 min after sorting/recovery. Live cell showed no blue fluorescence while a dead cell showed strong blue fluorescence under a excitation wavelength of 445 nm. Scale bar: 10  $\mu\text{m}$ .

## Supplementary Tables

**Table S1. Comparison between existing systems and D<sup>2</sup> system.**

|                                             | System accessibility | Output Format                  | Positive target ratios (%) | Starting cell number (x 10 <sup>6</sup> cells) | Sorting throughput (Hz) | Recovery throughput (Hz) | Sorted hits recovery rate (%) |
|---------------------------------------------|----------------------|--------------------------------|----------------------------|------------------------------------------------|-------------------------|--------------------------|-------------------------------|
| Nan et al. <sup>30</sup> (ODC)              | Open                 | Microtube                      | 1, 5, 10                   | N/A                                            | 200                     | ~0.3                     | ~98                           |
| Cole et al. <sup>29</sup> (PDM)             | Open                 | Customized nano-well substrate | 5                          | 1                                              | 50-100                  | ~1                       | N/A                           |
| Josephides et al. <sup>32</sup> (Cyto-Mine) | Closed               | Well plate                     | 2                          | 0.1 - 40                                       | 300                     | N/A                      | ~99                           |
| Pernod et al. <sup>41</sup> (LiveDrop)      | Closed               | Well plate                     | N/A                        | 0.5                                            | 1000                    | N/A                      | N/A                           |
| This work (D <sup>2</sup> )                 | Open                 | Well plate                     | 0.25, 0.1                  | 0.01, 0.1                                      | 50                      | ~0.1                     | ~90                           |

**NOTE:** The preferred features for rare single-cell isolation/recovery are highlighted in red. ODC is on-demand droplet collection. PDM is printed droplet microfluidics. D<sup>2</sup> is droplet-digital microfluidics.

**Table S2. Statistics for the recovery rate of 5, 10, 20, 50 beads using D<sup>2</sup> and tubing methods.**

| Recovery rate (%) |                |        |                |        |         |
|-------------------|----------------|--------|----------------|--------|---------|
| Number of beads   | Mean           |        | Std. Deviation |        | P-value |
|                   | D <sup>2</sup> | Tubing | D <sup>2</sup> | Tubing |         |
| 5                 | 93.33          | 80     | 11.55          | 0      | 0.1161  |
| 10                | 96.67          | 90     | 5.774          | 17.32  | 0.5614  |
| 20                | 88.33          | 90     | 12.58          | 17.32  | 0.8993  |
| 50                | 96             | 71.33  | 5.29           | 26.1   | 0.1839  |
